# Supplementary material for: Time Course of Growth Differentiation Factor-15 levels in Post-Resuscitation-Shock after Out-of-hospital Cardiac Arrest
Source: Research Square preprint supplement (doi:10.21203/rs.3.rs-6810991/v1), 2025-06-13
Supplement: Supplementary file 1 [file d66cb84dc121af94fbf09b78.docx]

**Supplement: Material and methods**

*Patient management*

OHCA patients were admitted to the medical ICU. Invasive hemodynamic monitoring of patients was performed with a pressure catheter in the radial artery. Crystalloid fluids were administered in all patients to achieve general treatment goals for a central venous pressure of 10–15 mmHg to optimize right heart filling pressure and achieve urine output >1.5 mL/kg/h. The hemodynamic target was mean arterial pressure >65 mmHg to ensure sufficient organ perfusion. Vasopressor agents were used if volume substitution alone did not result in adequate hemodynamics or was not feasible. Clinical and laboratory data were extracted from the ICU's computer organised patient report assistant patient data management system (COPRA system GmbH, Berlin, Germany). Targeted temperature management after ROSC was applied according to ERC guidelines [S1].

Primary cardiac causes (e.g. acute myocardial infarction, AMI, arrhythmogenic cardiomyopathies, myocarditis) were distinguished from primary non-cardiac causes of OHCA (e.g. acute respiratory failure, electrolyte disturbances, acute haemorrhage, acute neurological disorders, intoxications). The cause of OHCA was defined in consultation with the intensive care physician, emergency physician and interventional cardiologist. A presumed AMI as underlying cause of OHCA was more likely with or defined as (1) a history of chest pain prior to collapse, (2) a known history of coronary artery disease, (3) ST elevations on the initial ECG after ROSC together with an acute coronary vessel occlusion or ruptured unstable plaque on coronary angiography.

*Outcomes*

Neurological outcome after OHCA was evaluated according to the Glasgow–Pittsburgh Cerebral Performance Category (CPC) at hospital discharge. The CPC comprises 5 categories: CPC 1 (good recovery), CPC 2 (moderate disability), CPC 3 (severe disability), CPC 4 (vegetative state) and CPC 5 (death). To obtain dichotomous outcome variables, CPC 1 and CPC 2 were classified as favourable, whereas CPC 3 to CPC 5 were deemed poor neurological outcomes.

*Echocardiography*

The 2021 ERC guidelines recommend early (as soon as possible) echocardiography in all patients to detect any underlying cardiac pathology and to quantify the degree of myocardial dysfunction. As recommended, 100% of the OHCA cohort underwent transthoracic echocardiography immediately after hospital admission by experienced emergency or intensive care physicians. In all OHCA patients echocardiography was used to assess LVEF, pericardial tamponade, high-grade valvular disease and acute signs of right heart failure as an indirect indicator of pulmonary embolism.

*Lactate measurements*

Lactate (as part of the standardised blood gas analysis) were carried out with the ABL800 Flex (Radiometer RSCH GmbH). After an OHCA, lactate elevations are prognostically relevant as markers for the no-flow time, i.e. the time from collapse to the start of cardiopulmonary resuscitation, and are determined as a result of systemic ischaemia. In the post-resuscitation period, persistently high lactate levels and impaired lactate clearance <1.5 mmol/L per hour serve as markers of ongoing hypoperfusion in shock and are independent predictors of survival [S2]

*Blood sample preparation and measurement of serum GDF-15 and NT-proBNP levels*

Venous blood samples were collected by research personnel in serum separator tubes from CAD controls after coronary angiography or resuscitated patients at five different time points: within the first three hours after ROSC (admission/day 0), 24 hours after ROSC (day 1), on the second (day 2), third (day 3) and fifth (day 5) day after CPR. Samples were allowed to clot for 15 min at room temperature before centrifugation for 15 min at 1000 x g. Serum was removed and aliquots were frozen at ≤ -20°C. For analyses serum aliquots were thawed once before ELISA and measured in a batch in duplicates.

Serum NT-proBNP levels is an established biomarker of heart failure and known to predict poor outcome after survived OHCA [S3]. GDF-15 and N-terminal B-type natriuretic peptide (NT-proBNP) serum levels were quantified using commercially available highly selective enzyme-linked immunosorbent assay kits (ELISA; Human GDF-15 Quantikine ELISA Kit, R&D Systems, USA; GDF-15; Human NT-proBNP DuoSet ELISA, R&D Systems, USA for NT-proBNP) according to the manufacturer’s instructions. The human recombinant GDF-15 or NT-proBNP provided by R&D Systems were used to perform standard curves. The average zero standard optical density was substracted from the average of the duplicate readings for each standard, control, and sample. The personnel performing the ELISA were blinded to the clinical informations.

**References**

S1. Nolan JP, Sandroni C, Böttiger BW, Cariou A, Cronberg T, Friberg H, et al. European Resuscitation Council and European Society of Intensive Care Medicine Guidelines 2021: Post-resuscitation care. Resuscitation 2021;161:220-69. https://doi.org/ 10.1016/j.resuscitation.2021.02.012.

S2. Williams TA, Martin R, Celenza A, Bremner A, Fatovich D, Krause J, et al. Use of serum lactate levels to predict survival for patients with out-of-hospital cardiac arrest: A cohort study. Emerg Med Australas. 2016;28:171-8.

S3. Myhre PL, Tiainen M, Pettilä V, Vaahersalo J, Hagve TA, Kurola J, et al. NT- proBNP in patients with out-of-hospital cardiac arrest: Results from the FINNRESUSCI Study. Resuscitation. 2016;104:12-8. https://doi.org/10.1016/j.resuscitation.2016.04.007.
